# Supplementary material for: The Impact of TSC-1 and -2 Mutations on Response to Therapy in Malignant PEComa: A Multicenter Retrospective Analysis
Source: MDPI journal article supplement (doi:10.3390/genes13111932), 2022-10-24
Supplement: s1 [file s1]

## Supplementary Section

**Table S1.** Patient Information.

| ID    | Pathologic Diagnosis | Malignant PEComa* | Surgical Resection | Metastatic at Diagnosis | Local Recurrence | Firstline Treatment | Response | Time to Progression (months) | Time to Death (months) |
|-------|----------------------|-------------------|--------------------|-------------------------|------------------|---------------------|----------|------------------------------|------------------------|
| WU-1  | PEComa               | No                | Yes                | No                      | No               | N/A                 | N/A      | N/A                          | 218.04                 |
| WU-2  | PEComa               | No                | Yes                | No                      | No               | N/A                 | N/A      | N/A                          | 69.24                  |
| WU-3  | PEComa               | No                | Yes                | No                      | No               | N/A                 | N/A      | N/A                          | 4.9                    |
| WU-4  | PEComa               | No                | Yes                | No                      | No               | N/A                 | N/A      | N/A                          | 1.02                   |
| WU-5  | PEComa               | Yes               | No                 | Yes                     | Unknown          | N/A                 | N/A      | N/A                          | 1.22                   |
| WU-6  | PEComa               | Yes               | Yes                | Yes                     | Yes              | Paclitaxel          | Unknown  | 2.79                         | 5.33                   |
| WU-7  | PEComa               | No                | Yes                | No                      | No               | N/A                 | N/A      | N/A                          | 133.97                 |
| WU-8  | Angiomyolipoma       | No                | Yes                | No                      | Yes              | mTOR Inhibitor      | Partial  | 54.35                        | 119.47                 |
| WU-9  | Angiomyolipoma       | No                | Yes                | No                      | No               | N/A                 | N/A      | N/A                          | 103.1                  |
| WU-10 | Angiomyolipoma       | No                | Yes                | No                      | No               | N/A                 | N/A      | N/A                          | 1.84                   |

|       |                        |     |     |         |         |            |                                   |       |       |
|-------|------------------------|-----|-----|---------|---------|------------|-----------------------------------|-------|-------|
| WU-11 | PEComa                 | No  | Yes | No      | No      | N/A        | N/A                               | N/A   | 0.2   |
| WU-12 | Angiomyolipoma         | Yes | Yes | Unknown | Unknown | Everolimus | No evidence of disease (resected) | 32.84 | 32.84 |
| WU-13 | Angiomyolipoma         | No  | Yes | Unknown | No      | N/A        | N/A                               | N/A   | 0.36  |
| WU-14 | Unknown                | No  | Yes | Unknown | No      | N/A        | N/A                               | N/A   | 0.85  |
| WU-15 | Angiomyolipoma         | Yes | Yes | Yes     | Yes     | Sirolimus  | Partial                           | 9.90  | 24.07 |
| WU-16 | Unknown                | No  | Yes | No      | No      | N/A        | N/A                               | N/A   | 57.01 |
| WU-17 | PEComa                 | No  | Yes | No      | No      | N/A        | N/A                               | N/A   | 45.73 |
| WU-18 | PEComa                 | No  | Yes | No      | No      | N/A        | N/A                               | N/A   | 48.89 |
| WU-19 | PEComa                 | Yes | Yes | Yes     | No      | ABI-009    | Stable Disease                    | 3.00  | 47.08 |
| WU-20 | Angiomyolipoma         | Yes | Yes | Yes     | Unknown | Everolimus | Stable Disease                    | 71.70 | 94.55 |
| WU-21 | Lyphangioliomyomatosis | No  | Yes | No      | Yes     | ABI-009    | Partial                           | 39.30 | 43.2  |

|       |                |     |     |     |         |               |                     |       |       |
|-------|----------------|-----|-----|-----|---------|---------------|---------------------|-------|-------|
| WU-22 | PEComa         | No  | Yes | No  | No      | N/A           | N/A                 | N/A   | 36.53 |
| WU-23 | PEComa         | Yes | Yes | No  | No      | N/A           | N/A                 | N/A   | 29.29 |
| WU-24 | PEComa         | No  | Yes | No  | No      | N/A           | N/A                 | N/A   | 29.59 |
| WU-25 | PEComa         | Yes | Yes | Yes | No      | Pembrolizumab | Partial             | 20.22 | 42.12 |
| WU-26 | PEComa         | No  | Yes | No  | No      | N/A           | N/A                 | N/A   | 17.29 |
| WU-27 | PEComa         | Yes | Yes | Yes | Unknown | Everolimus    | Unknown             | 1.45  | 3.29  |
| WU-28 | PEComa         | Yes | Yes | No  | No      | N/A           | N/A                 | N/A   | 14.83 |
| WU-29 | Angiomyolipoma | No  | Yes | No  | No      | N/A           | N/A                 | N/A   | 12.46 |
| WI-30 | PEComa         | Yes | Yes | Yes | Yes     | Temsirolimus  | Progressive Disease | 2.00  | 24.76 |
| WI-31 | PEComa         | Yes | Yes | No  | No      | N/A           | N/A                 | N/A   | 4.6   |
| IO-32 | PEComa         | No  | Yes | No  | No      | N/A           | N/A                 | N/A   | 0     |
| IO-33 | PEComa         | No  | Yes | No  | No      | N/A           | N/A                 | N/A   | 93.8  |

|       |         |     |     |     |     |                            |                                   |        |        |
|-------|---------|-----|-----|-----|-----|----------------------------|-----------------------------------|--------|--------|
| IO-34 | PEComa  | Yes | Yes | No  | No  | Sirolimus                  | No evidence of disease (resected) | 99.58  | 99.58  |
| IO-35 | PEComa  | Yes | Yes | Yes | Yes | Everolimus                 | Unknown                           | 8.15   | 8.15   |
| IO-36 | PEComa  | Yes | Yes | Yes | Yes | Sirolimus                  | Partial                           | 14.04  | 14.04  |
| IO-37 | PEComa  | Yes | Yes | No  | Yes | Everolimus                 | Stable Disease                    | 35.01  | 35.01  |
| IO-38 | PEComa  | Yes | Yes | No  | No  | N/A                        | N/A                               | N/A    | 12.23  |
| 39    | PEComa  | Yes | Yes | No  | Yes | Doxorubicin and Ifosfamide | Unknown                           | 109.32 | 188.58 |
| 40    | PEComa  | Yes | Yes | Yes | Yes | Gemcitabine and Docetaxel  | Stable Disease                    | 4.87   | 14.76  |
| VU41  | Unknown | Yes | Yes | No  | No  | N/A                        | N/A                               | N/A    | 15.75  |
| VU42  | PEComa  | Yes | Yes | Yes | Yes | Doxorubicin and Olaratumab | Progressive Disease               | 1.00   | 9.4    |

|           |                |     |     |         |         |                                |                        |       |        |
|-----------|----------------|-----|-----|---------|---------|--------------------------------|------------------------|-------|--------|
| VU4<br>3  | PEComa         | Yes | Yes | Yes     | Yes     | Sirolimus                      | Stable Disease         | 3.22  | 5.52   |
| VU4<br>4  | PEComa         | Yes | Yes | No      | No      | N/A                            | N/A                    | N/A   | 2.56   |
| VU4<br>5  | Unknown        | No  | Yes | No      | No      | N/A                            | N/A                    | N/A   | 23.38  |
| VU4<br>6  | Angiomyolipoma | Yes | Yes | Yes     | Yes     | Doxorubicin and<br>Dacarbazine | Progressive<br>Disease | 2.66  | 95.64  |
| 47        | PEComa         | Yes | No  | Yes     | Yes     | Sirolimus                      | Unknown                | 1.00  | 0.95   |
| 48        | PEComa         | Yes | No  | Yes     | Yes     | Arimidex                       | Stable Disease         | 18.15 | 28.21  |
| WU-<br>30 | Angiomyolipoma | Yes | Yes | Unknown | Unknown | N/A                            | N/A                    | N/A   | 0.5589 |

\*Malignant PEComa was defined as pathology demonstrating two or more of the following: primary tumor > 5 cm, infiltrative, high nuclear grade and cellularity, mitotic rate  $\geq 1/50$  high power field, necrosis, vascular invasion.
