# Supplementary figures and images for: The Impact of TSC-1 and -2 Mutations on Response to Therapy in Malignant PEComa: A Multicenter Retrospective Analysis
Source: MDPI journal article supplement (doi:10.3390/genes13111932), 2022-10-24

Supplementary Section

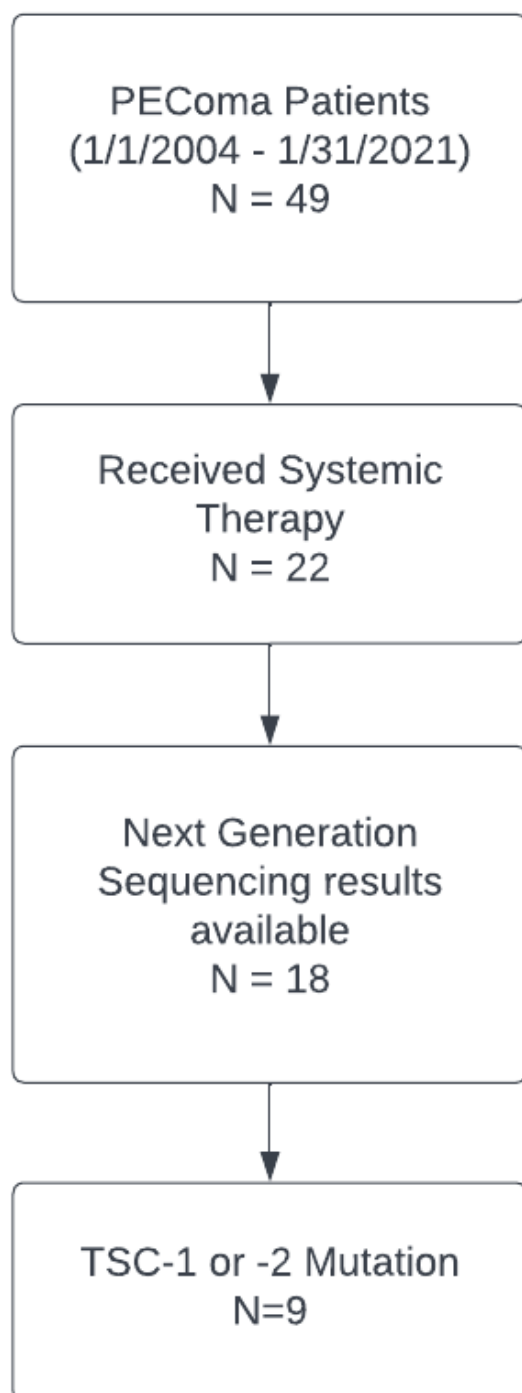

Figure S1. Flow Diagram.

Supplement: s1 [file s1]
